# Supplementary material for: TREM2 deficiency aggravates renal injury by promoting macrophage apoptosis and polarization via the JAK-STAT pathway in mice
Source: PubMed Central journal article supplement (PMC11161629; doi:10.1038/s41419-024-06756-w), 2024-06-07

# Figure 4e western blots

## caspace3

pro-caspase3

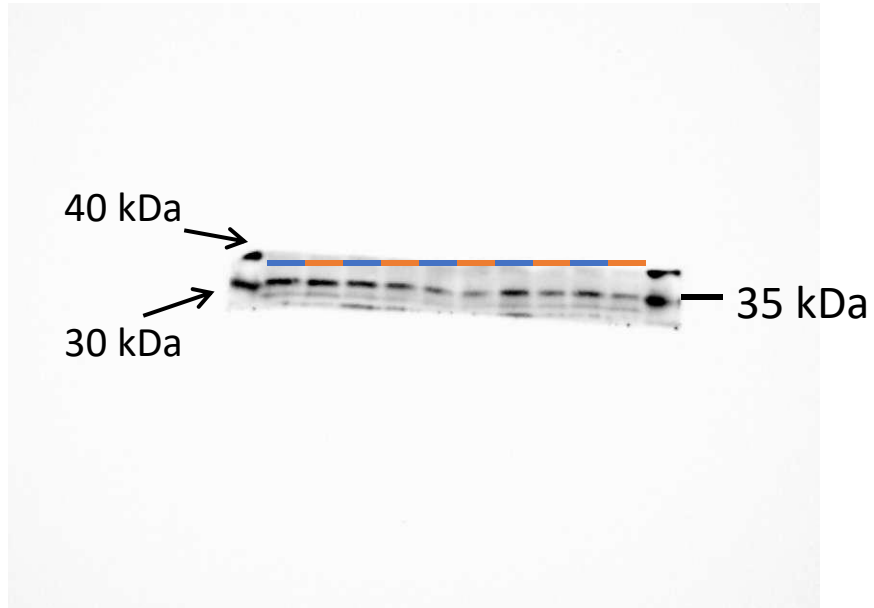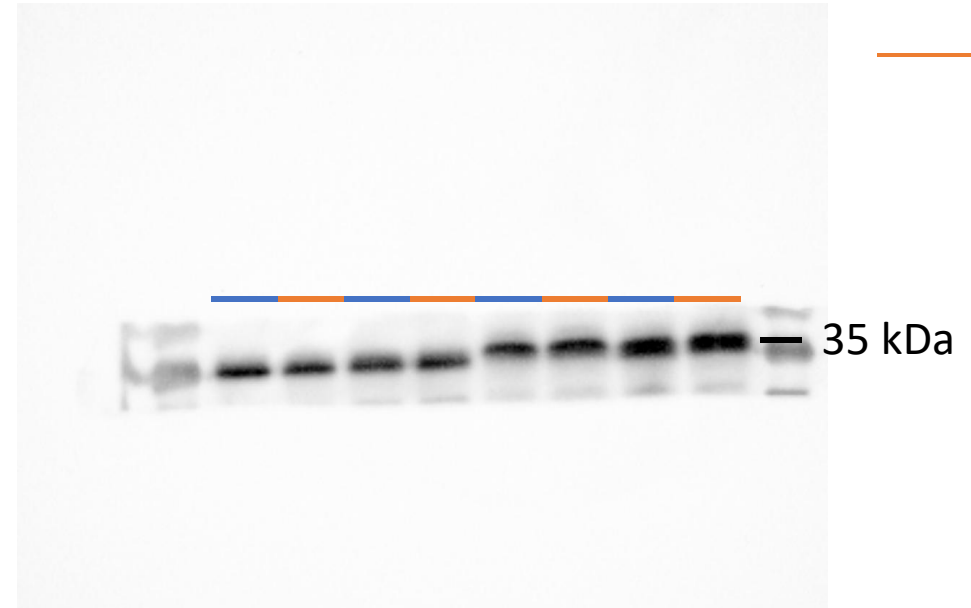

— WT  
— *Trem2*<sup>-/-</sup>

cleaved-caspase3

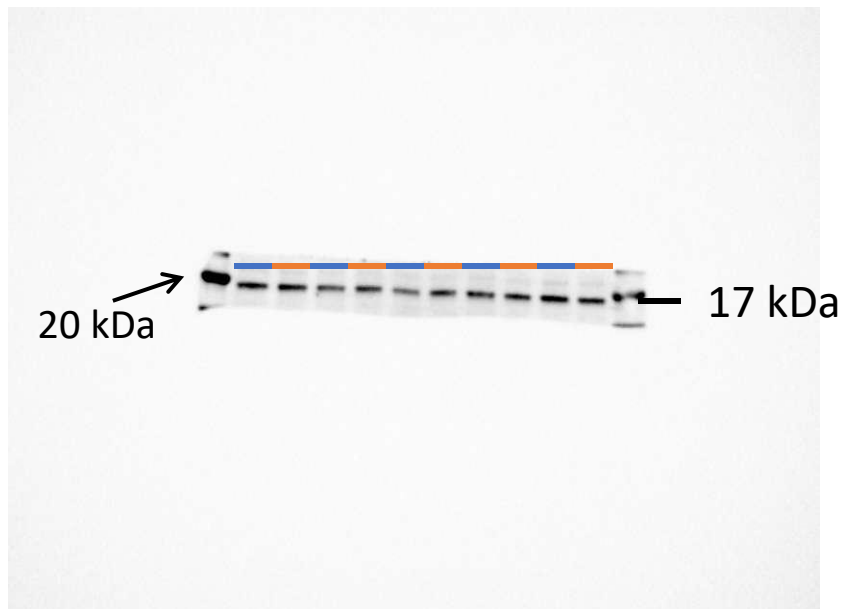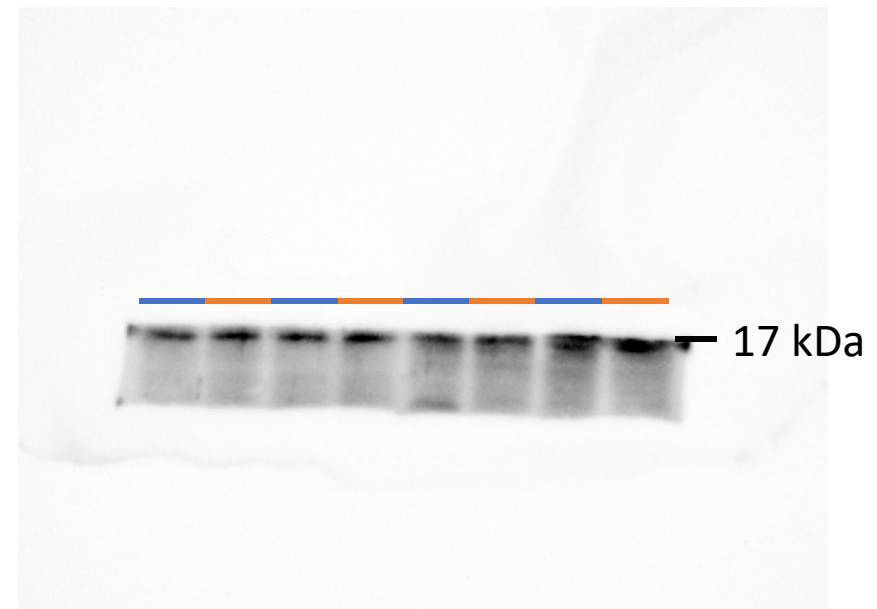

# Figure 4e western blots

**$\beta$ -actin**

— WT  
— *Trem2*<sup>-/-</sup>

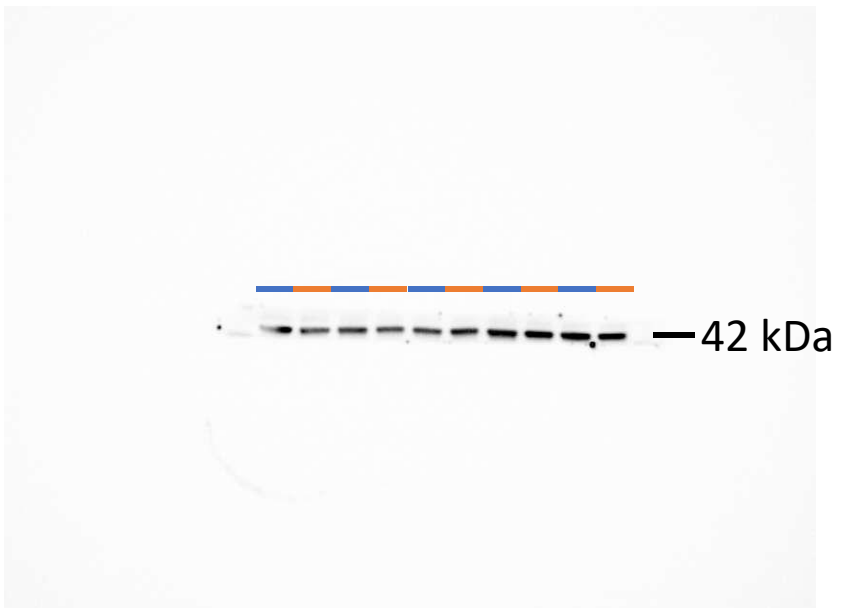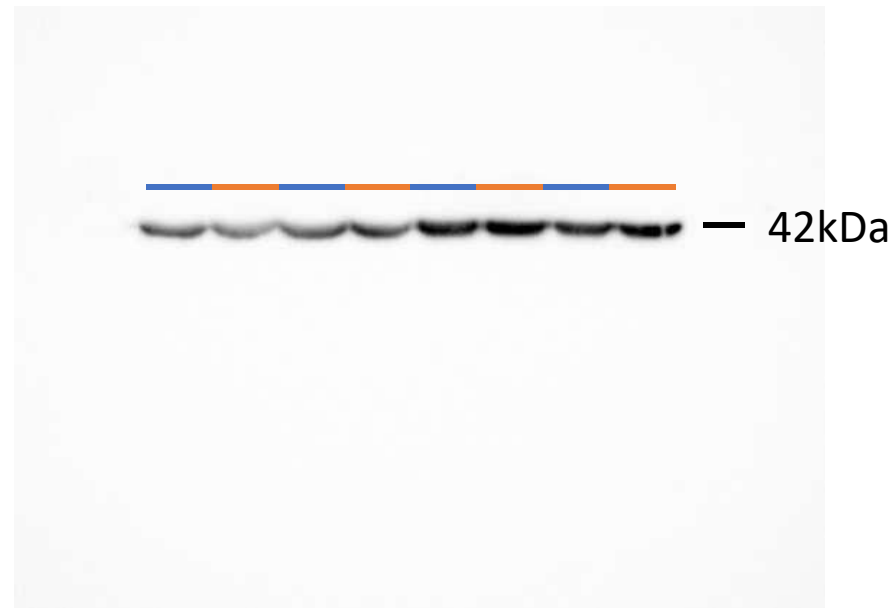

# Figure 4e western blots

## Bcl2

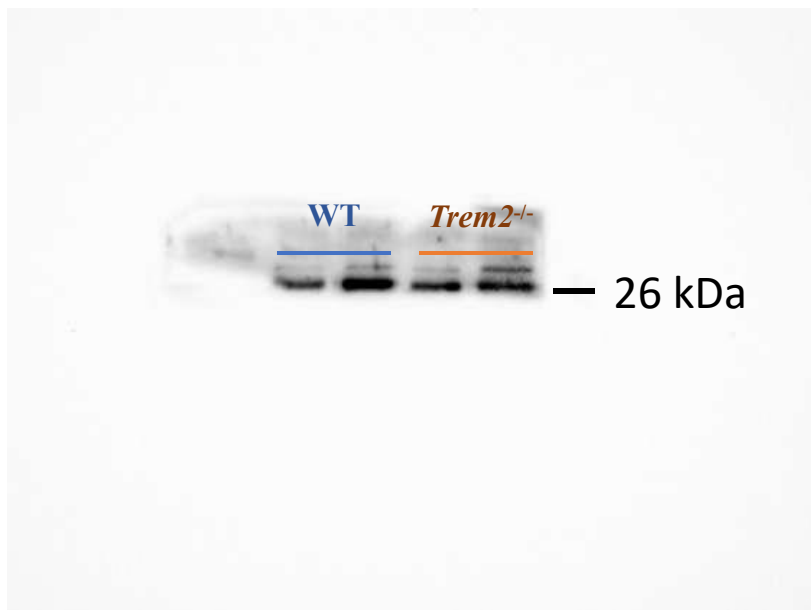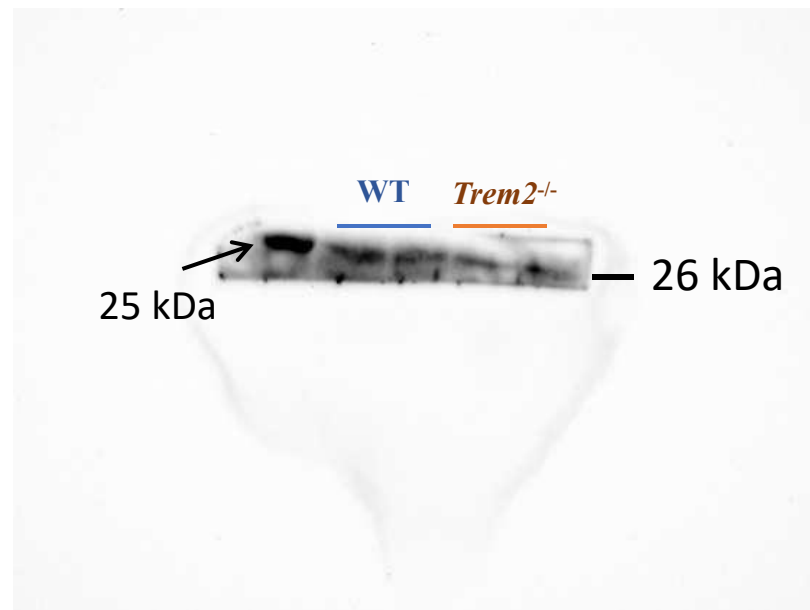

## $\beta$ -actin

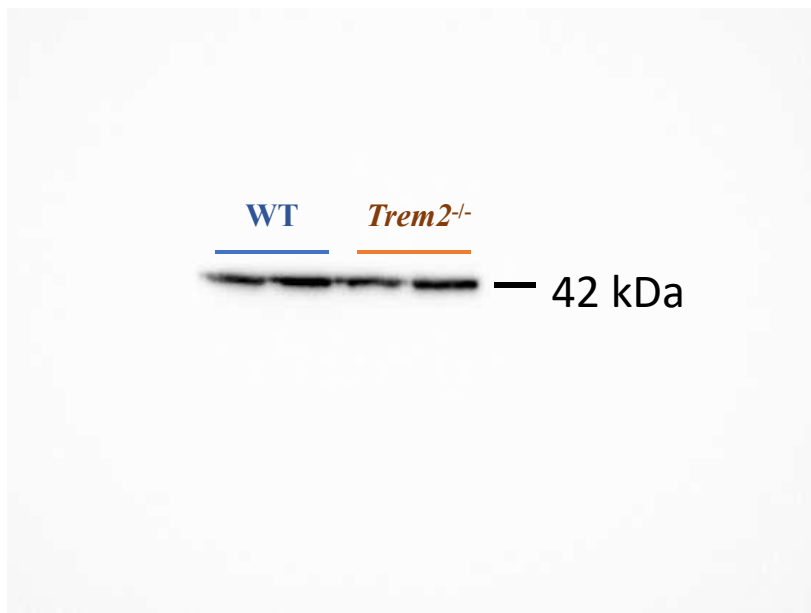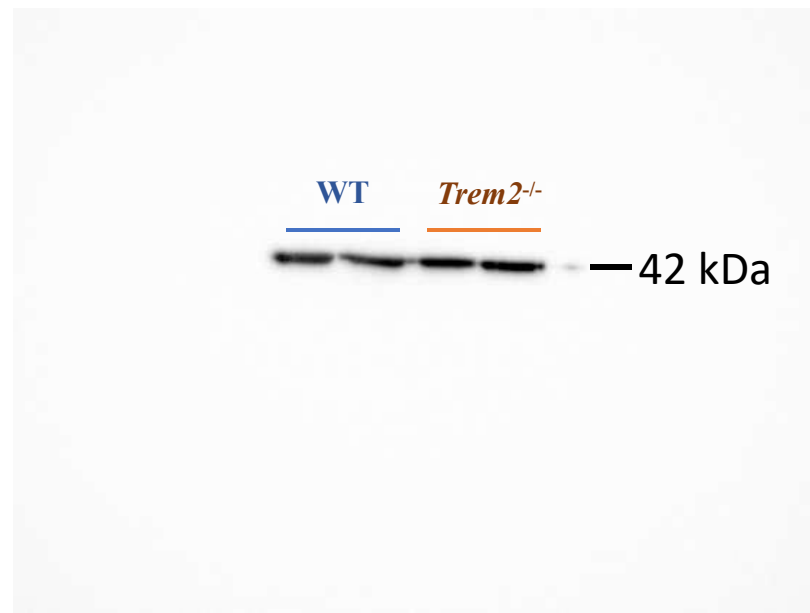

# Figure 5d western blots

## mTOR

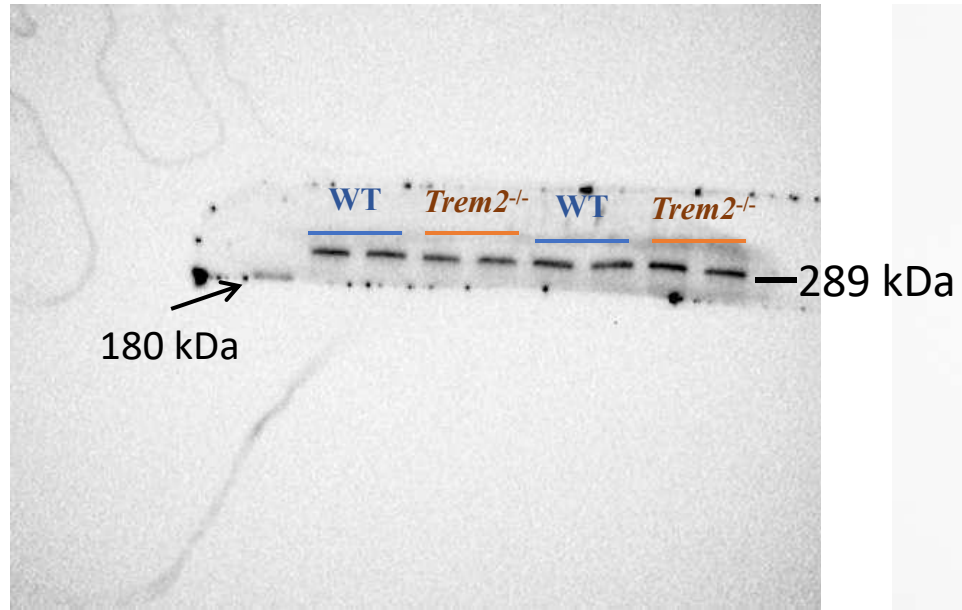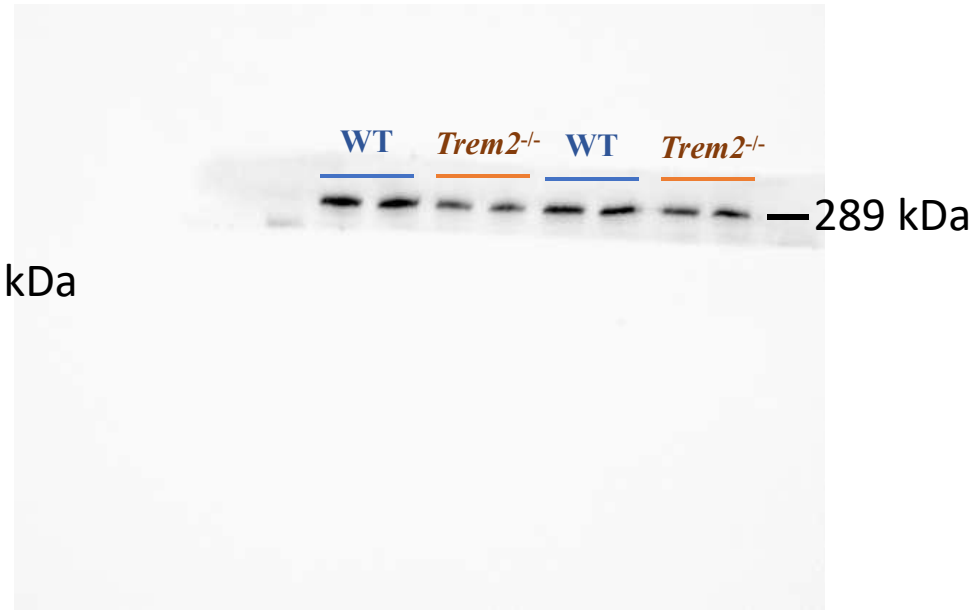

## p-mTOR

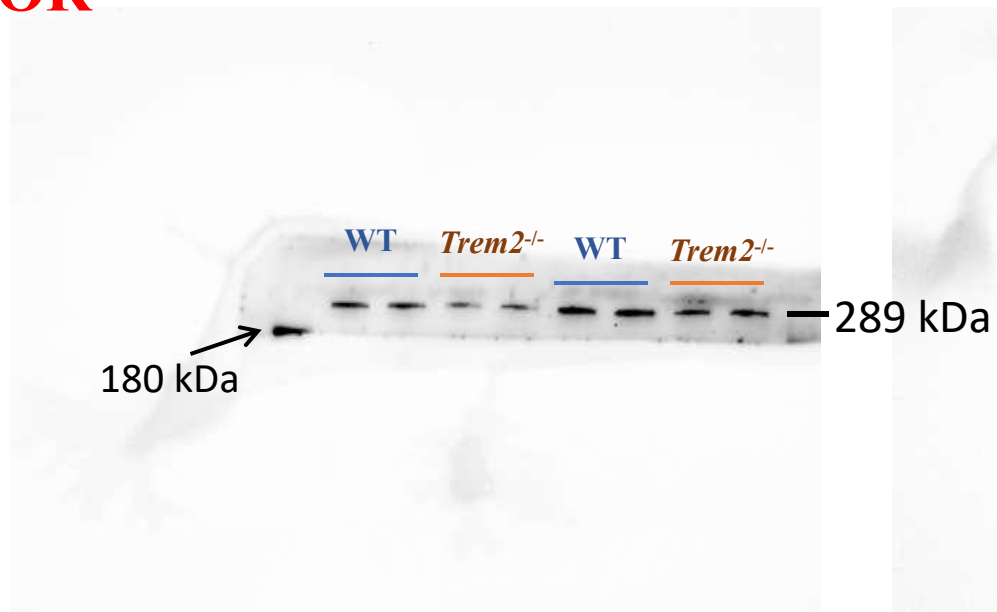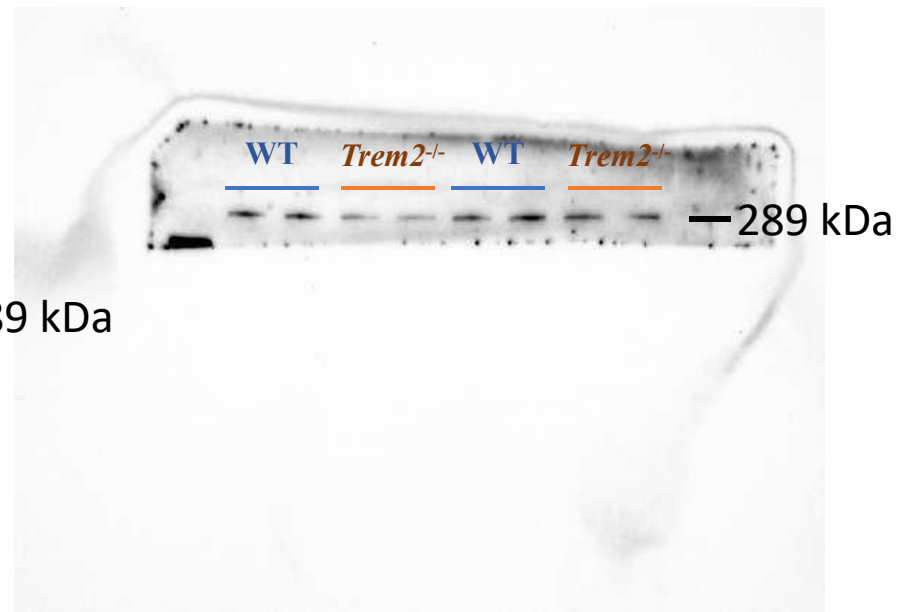

# Figure 5d western blots

## Akt

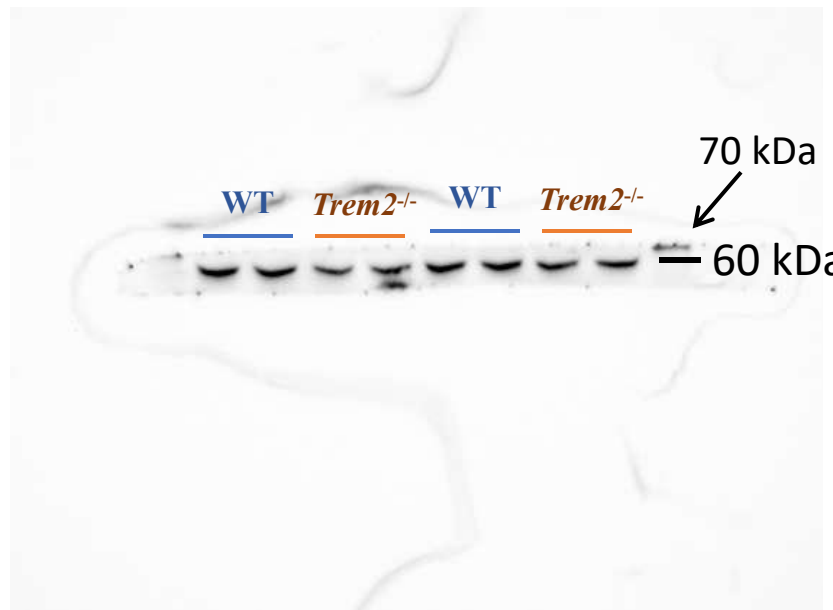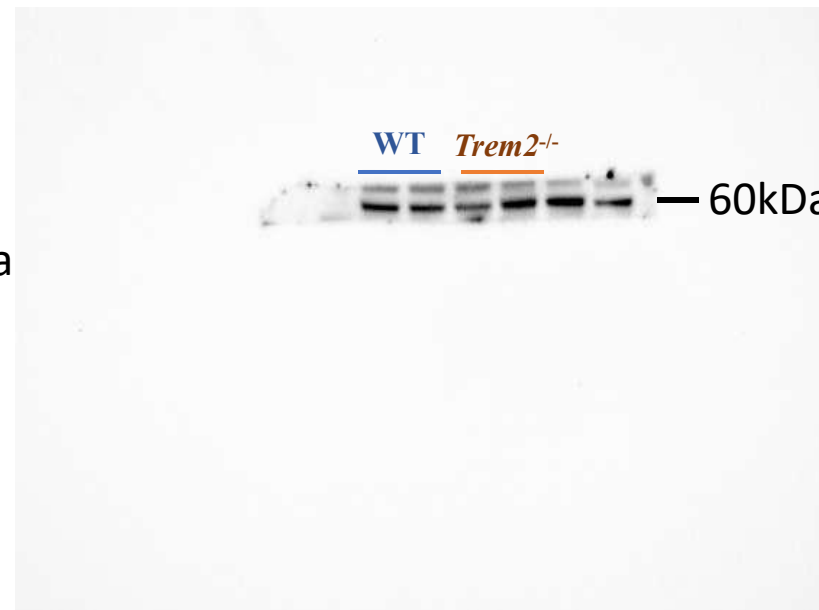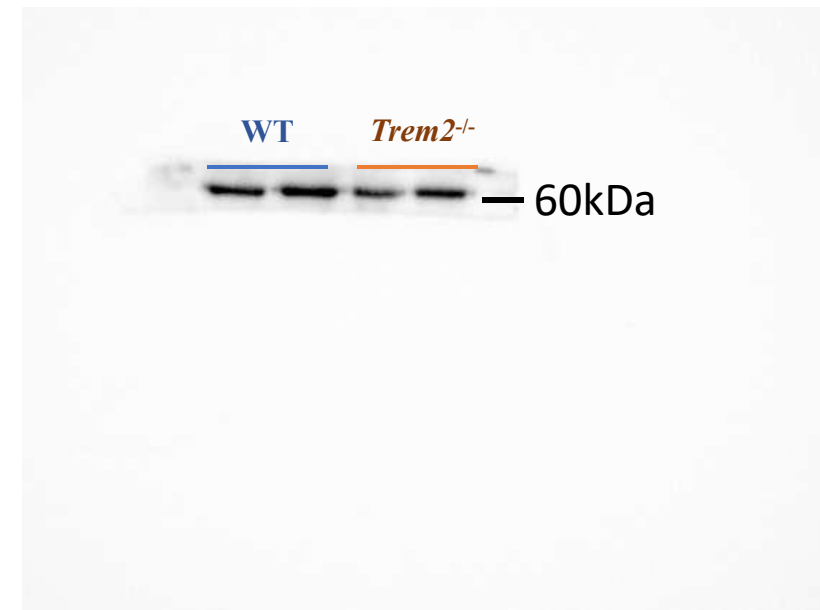

## p-Akt

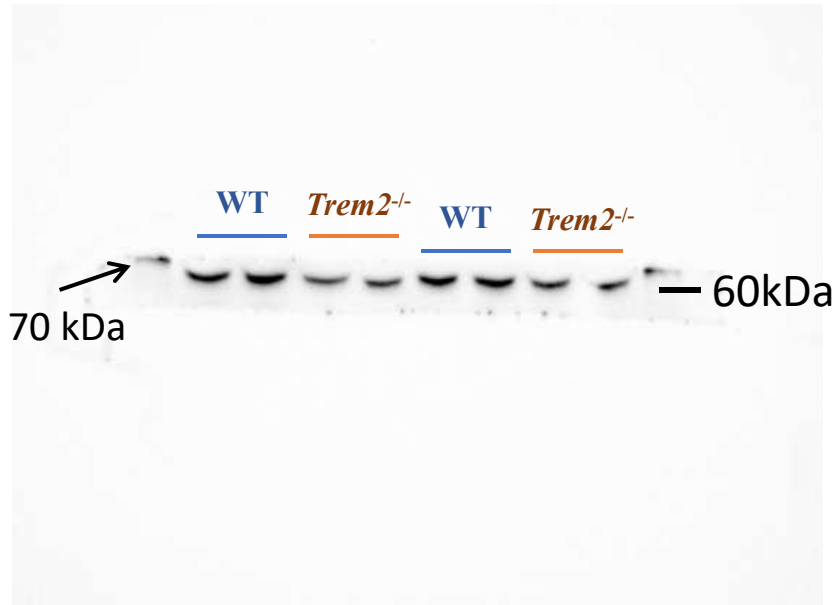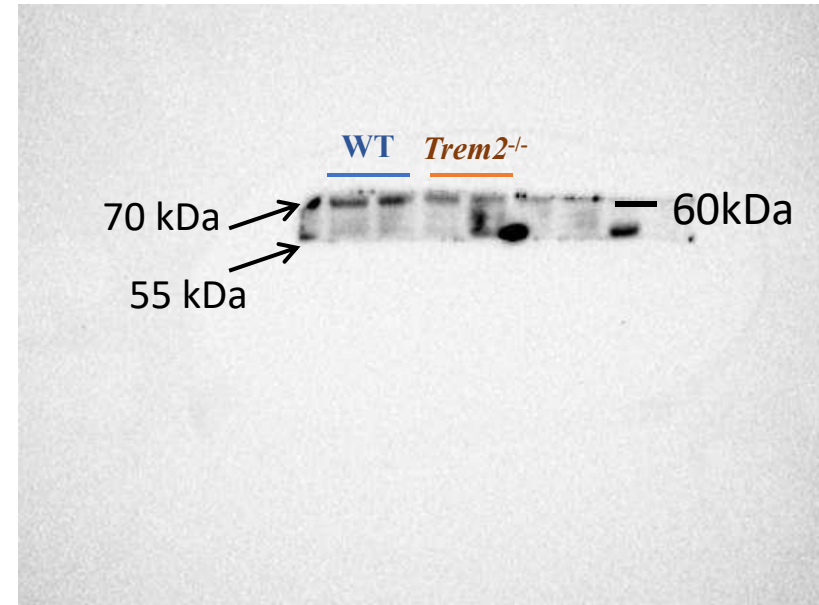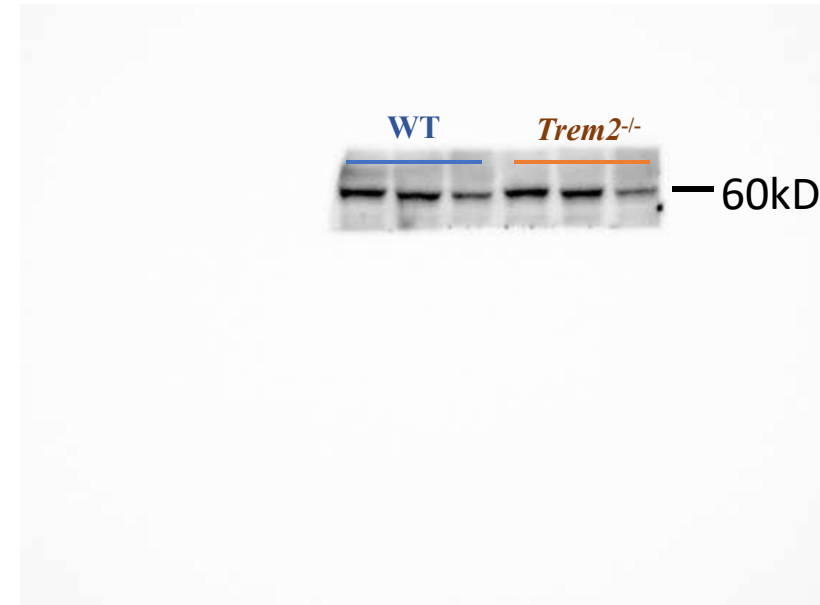

# Figure 5d western blots

p70S6K

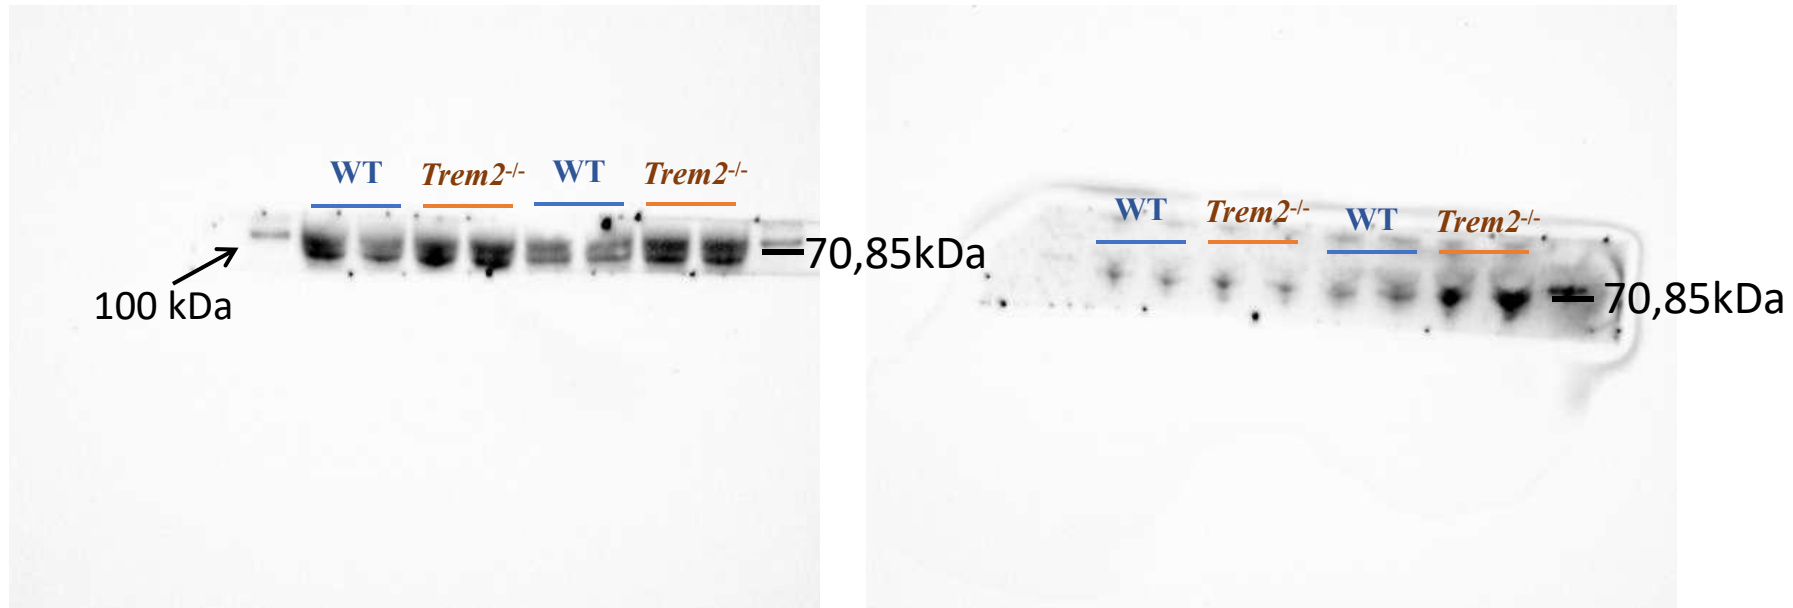

# Figure 5d western blots

## $\beta$ -actin

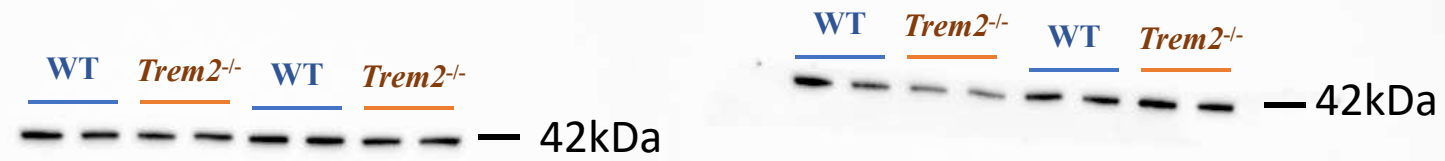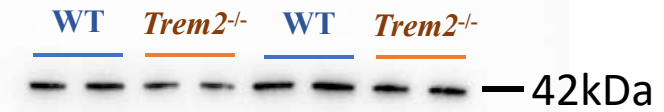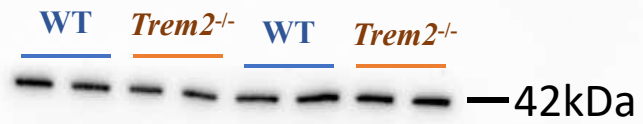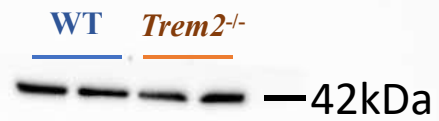

# Figure 5d western blots

## GAPDH

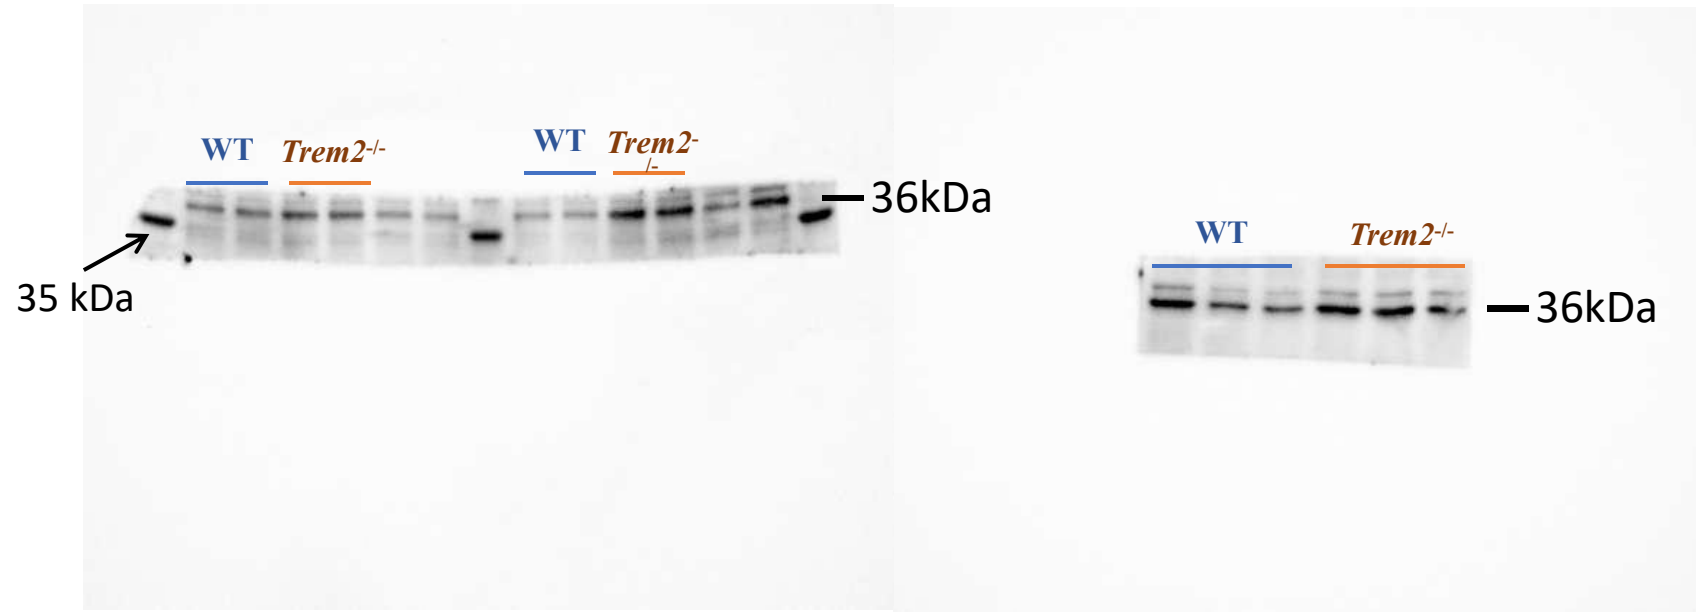



# Figure 7e western blots

## JAK2

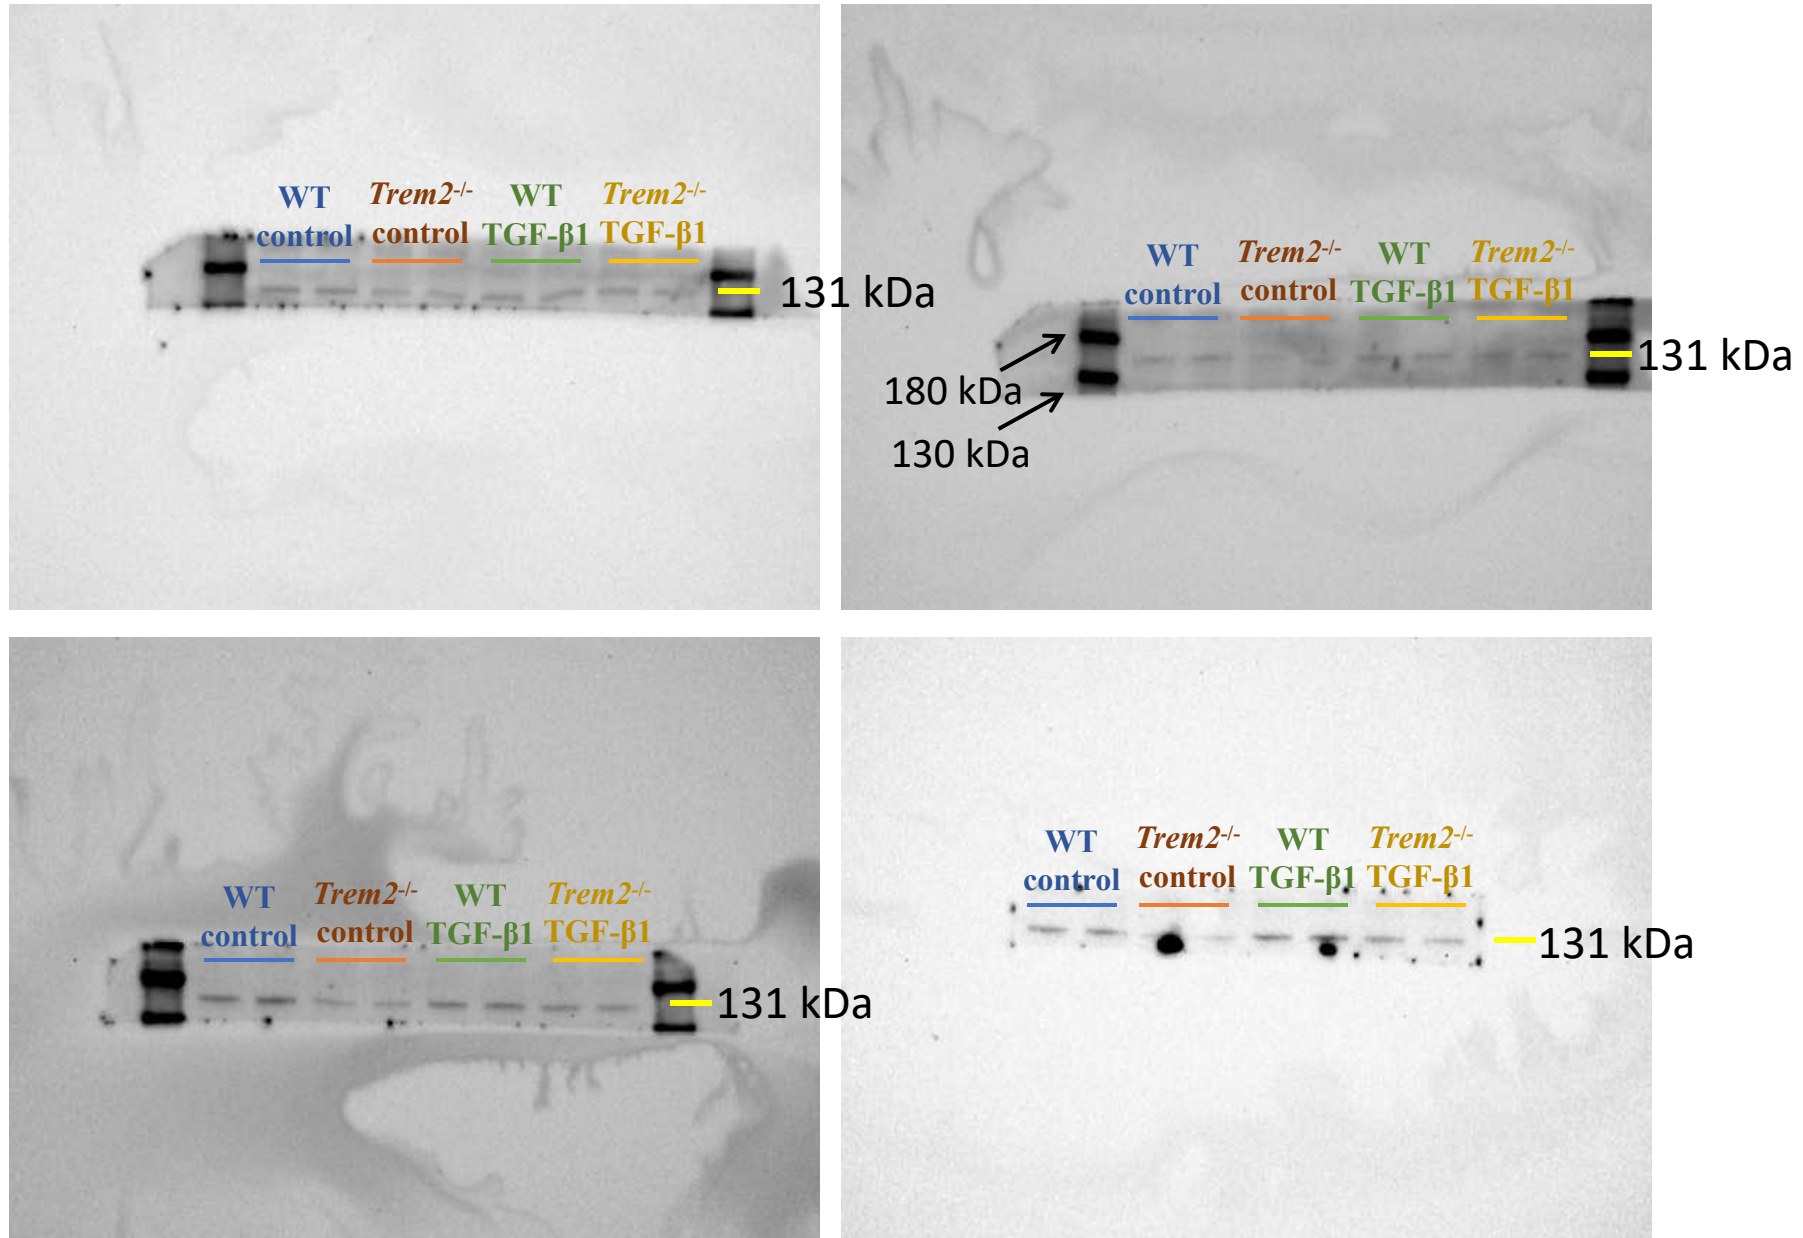

# Figure 7e western blots

## p-JAK2

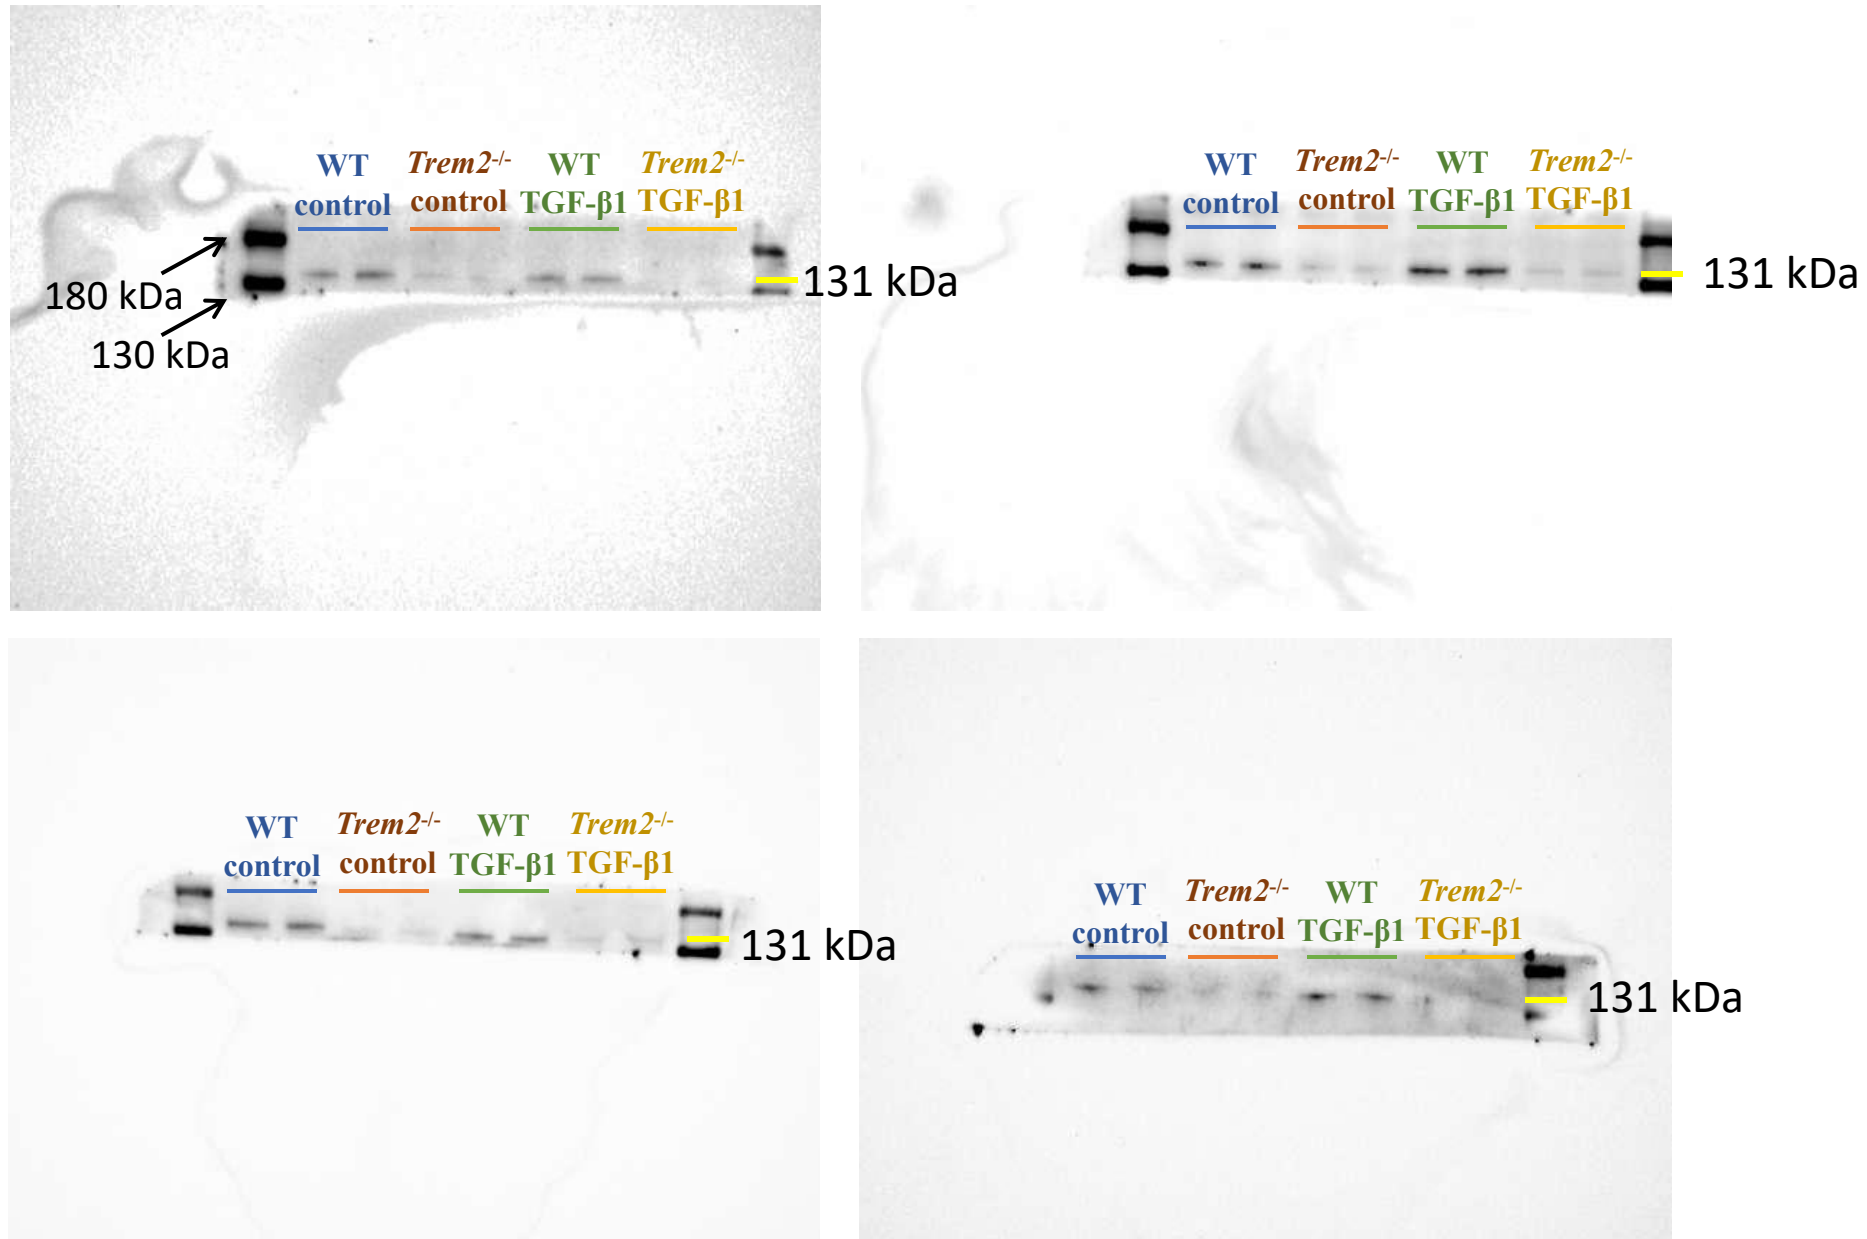

# Figure 7e western blots

## STAT1

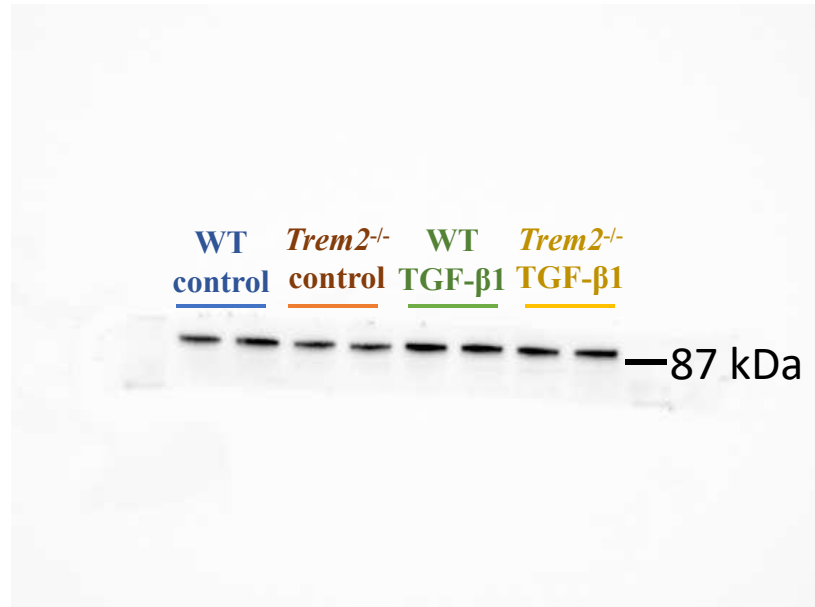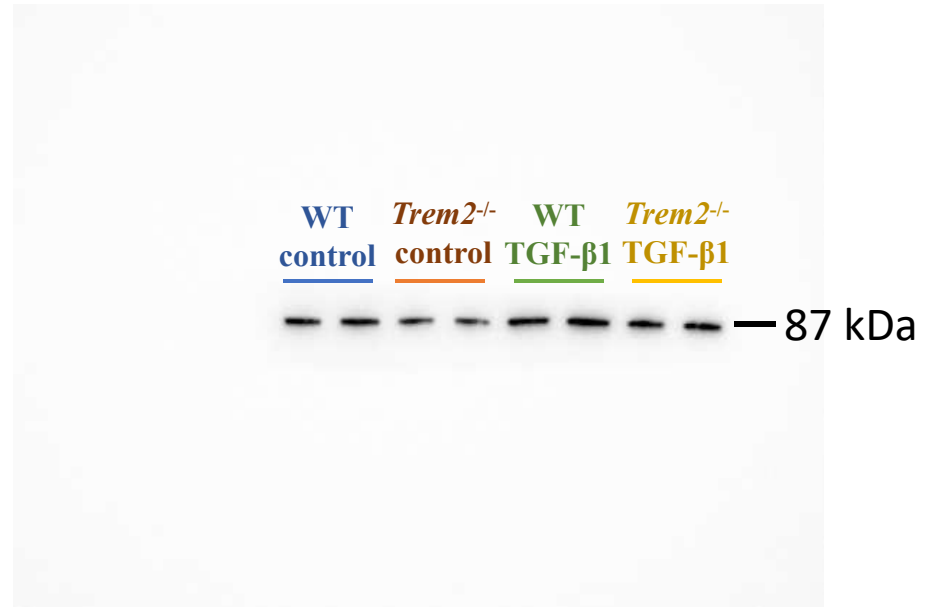

## p-STAT1

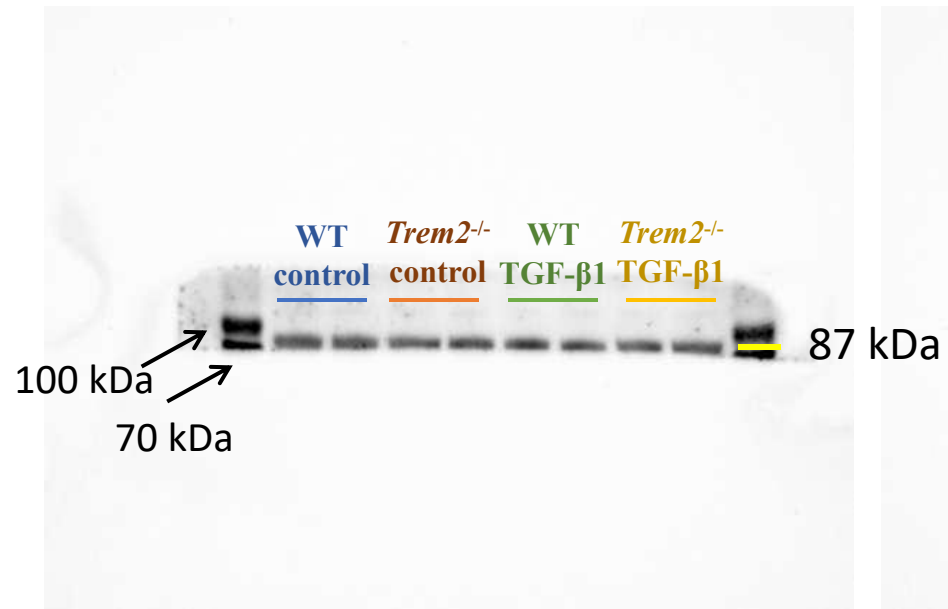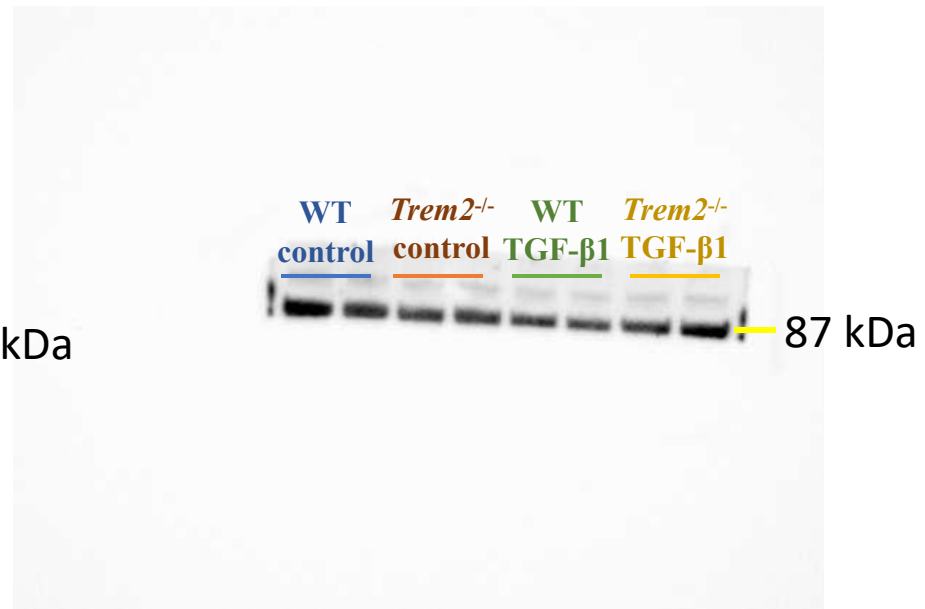

# Figure 7e western blots

## STAT3

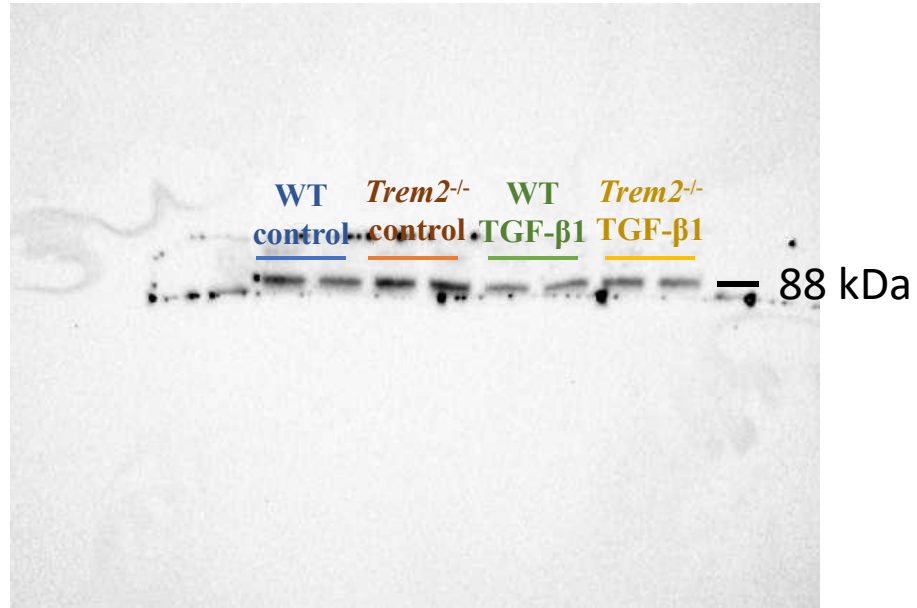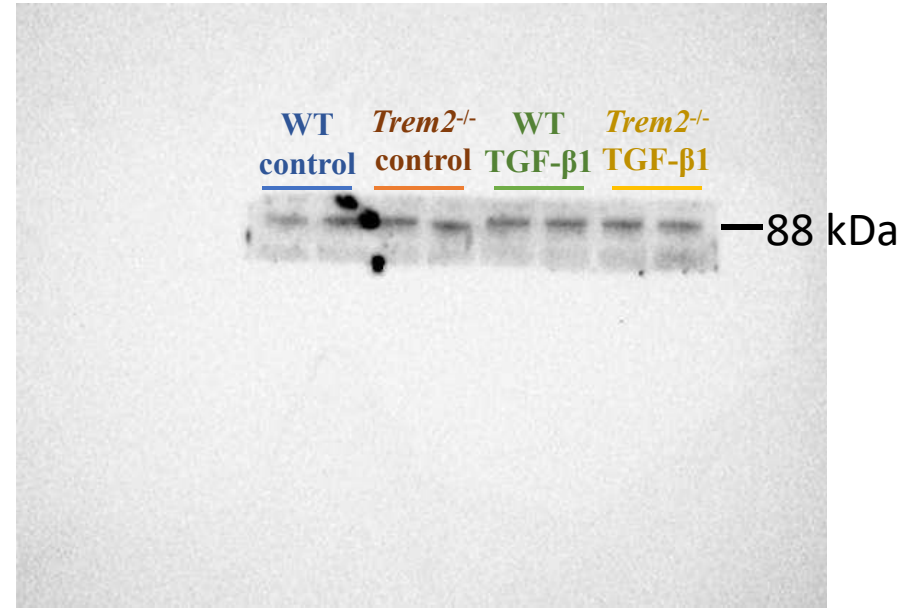

## p-STAT3

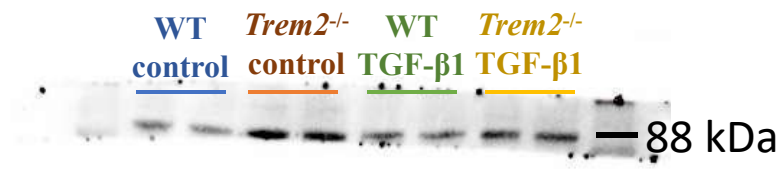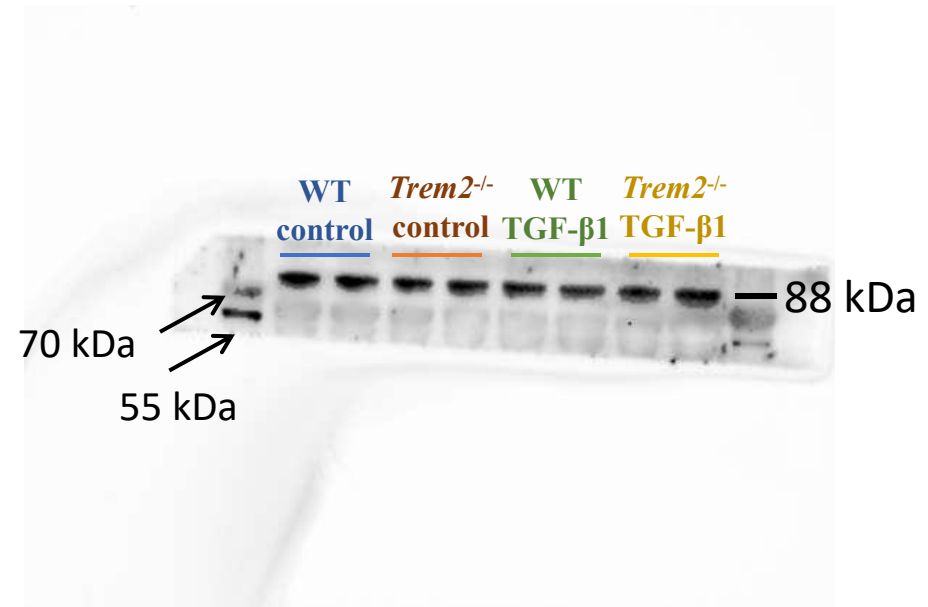

**Figure 7e** western blots

**$\beta$ -actin**

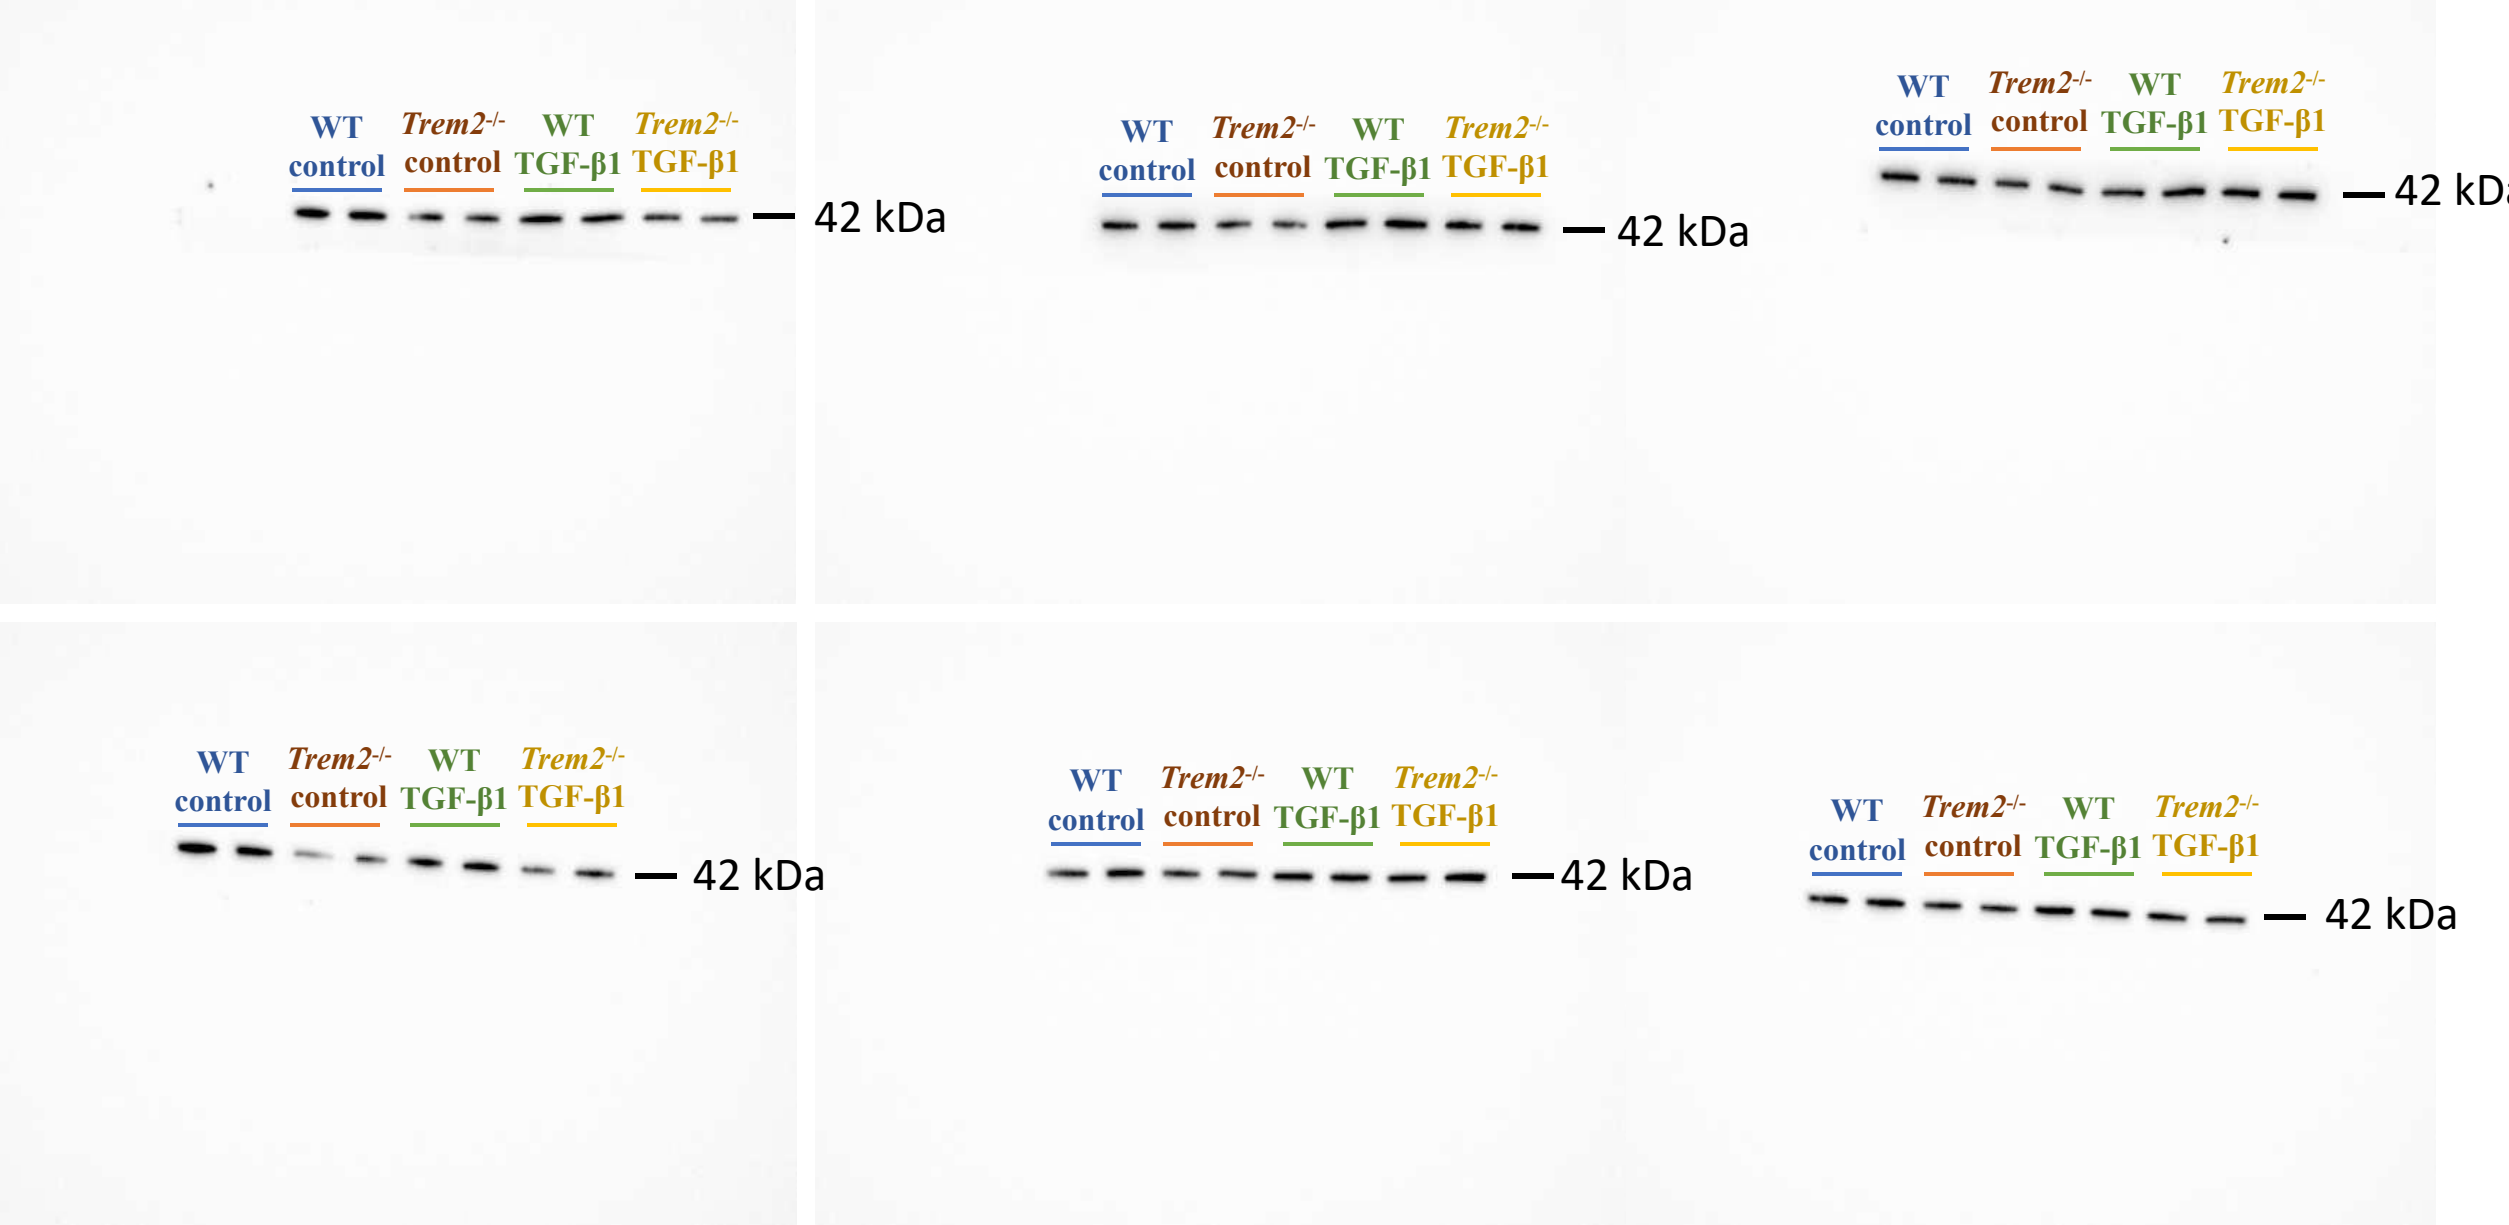

**Figure 7g** western blots

**SOCS1**

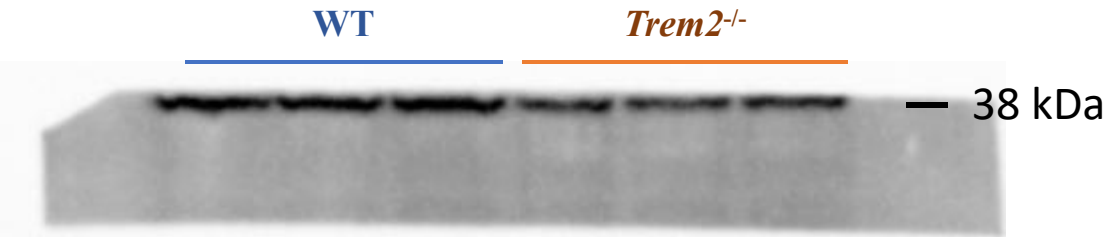

**SOCS3**

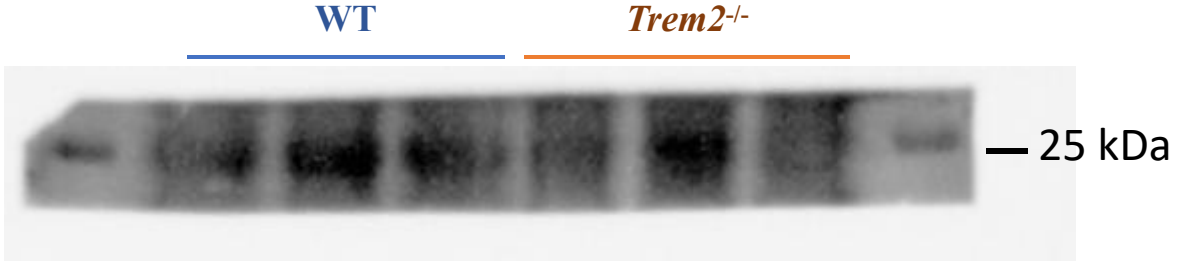

**$\beta$ -Tubulin**

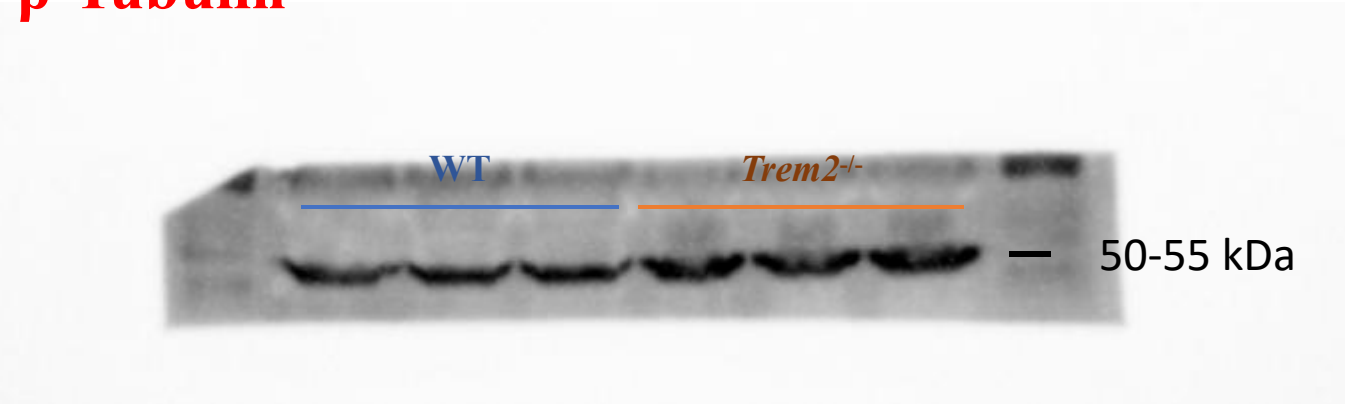

Supplement: 41419_2024_6756_MOESM2_ESM.pdf [file 41419_2024_6756_MOESM2_ESM.pdf]
